# Supplementary material for: Highly activated Ag-doped Fe-based catalysts designed for Fischer–Tropsch synthesis
Source: Royal Society of Chemistry journal article supplement (doi:10.1039/c5ra08444j), 2015-01-01
Supplement: c5ra08444j1.pdf [file c5ra08444j1.pdf]

Supplementary Results:

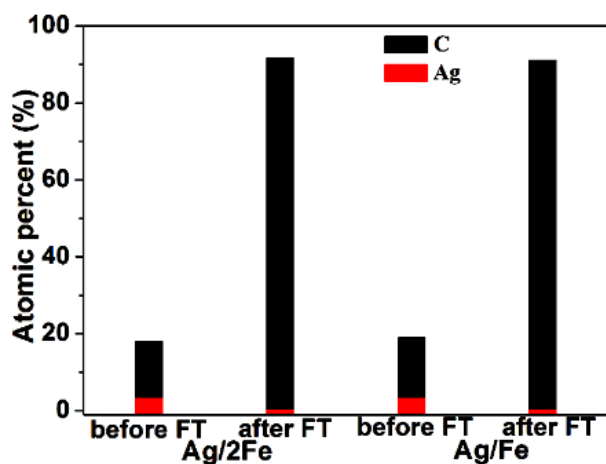

Fig. S1 Atomic percentage of C (black) and Ag (red) in Ag/2Fe and Ag/Fe obtained before and after FT reaction.

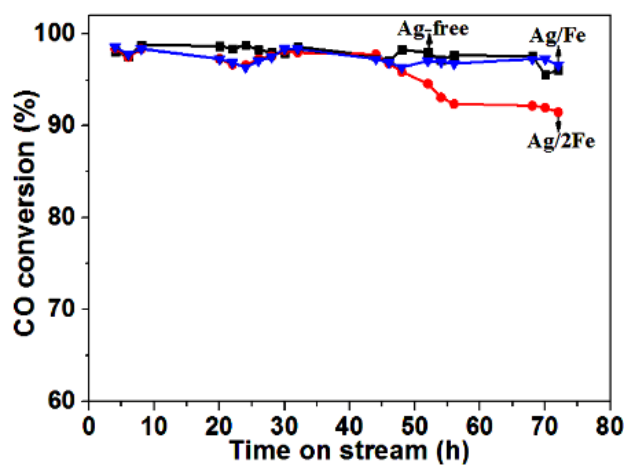

Fig. S2 CO conversion of Ag-free, Ag/2Fe, and Ag/Fe catalyst with time on stream.

**Table S1** FT performances of free-Ag, 2Fe/Ag, and Fe/Ag catalysts. Catalytic tests were performed at 280 °C, a H<sub>2</sub>/CO ratio of 1, and 20 bar, results after 24 h are shown.

| Performance                | free-Ag | 2Fe/Ag | Fe/Ag |
|----------------------------|---------|--------|-------|
| CO conversion (%)          | 98.5    | 98.8   | 98.7  |
| Mass balance               | 98.3    | 97.9   | 98.7  |
| $\alpha$ -Value            | 0.36    | 0.53   | 0.51  |
| Product selectivity (wt%)  |         |        |       |
| CH <sub>4</sub>            | 26.1    | 21.4   | 19.6  |
| C <sub>2-4</sub> paraffins | 36.3    | 21.3   | 20.5  |
| C <sub>2-4</sub> olefins   | 7.3     | 19.0   | 19.6  |
| C <sub>5-11</sub>          | 25.1    | 37.6   | 38.9  |
| C <sub>12+</sub>           | 5.2     | 0.7    | 1.4   |
| Olefin/Paraffin (wt/wt)    |         |        |       |
| C <sub>2-4</sub>           | 0.20    | 0.89   | 0.96  |
| C <sub>5-11</sub>          | 0.77    | 0.89   | 1.29  |
